# Supplementary material for: Automated scoring for a Tablet-based Rey Figure copy task differentiates constructional, organisational, and motor abilities
Source: PubMed Central journal article supplement (PMC8295394; doi:10.1038/s41598-021-94247-9), 2021-07-21
Supplement: 41598_2021_94247_MOESM1_ESM.pdf [file 41598_2021_94247_MOESM1_ESM.pdf]

*Automated scoring for a Tablet-based Rey Figure Copy task differentiates  
constructional, organisational, and motor abilities*

Marco A. Petilli<sup>1\*</sup>, Roberta Daini<sup>1,2</sup>, Francesca Lea Saibene<sup>3</sup>, Marco Rabuffetti<sup>3</sup>

1 Psychology, Università degli Studi di Milano Bicocca, Milan, Italy

2 NeuroMI - Milan Center for Neuroscience, Milan, Italy

3 IRCCS Fondazione Don Carlo Gnocchi ONLUS, Milan, Italy

\*Corresponding author:

marco.petilli@unimib.it

University of Milano-Bicocca

Department of Psychology

Piazza dell'Ateneo Nuovo, 1 – 20126 Milan, Italy

Tel. +39 02 6448 3767

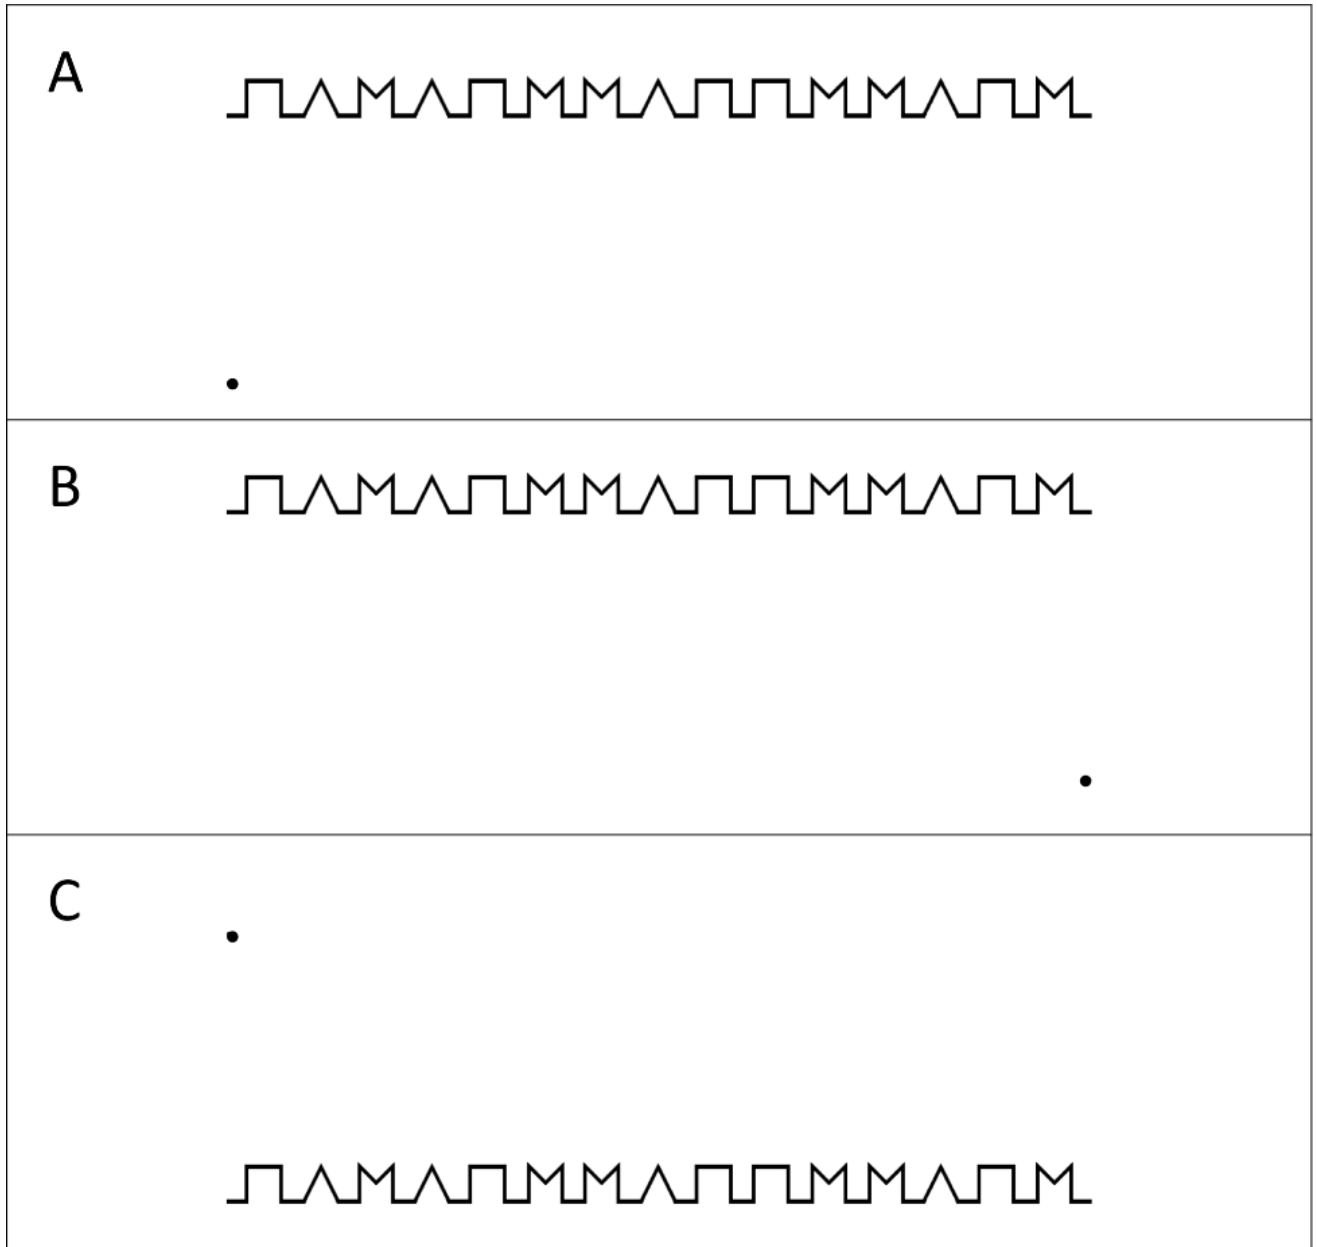

**Supplementary Figure S1:** Luria Motor Task. Figure created with Adobe Photoshop 7.0 (Adobe Corp; [www.adobe.com/](http://www.adobe.com/)).
